## Frailty is an independent risk factor of one-year mortality after elective orthopedic surgery: a prospective cohort study

Xiaoyun Sun<sup>1,\*</sup>, Yuying Shen<sup>2,\*</sup>, Muhuo Ji<sup>3</sup>, Shanwu Feng<sup>1</sup>, Yuzhu Gao<sup>4</sup>, Jianjun Yang<sup>5</sup>, Jinchun Shen<sup>4</sup>

<sup>1</sup>Department of Anesthesiology, Women's Hospital of Nanjing Medical University, Nanjing Maternity and Child Health Care Hospital, Nanjing 210004, China

<sup>2</sup>Department of General Practice, Nanjing First Hospital, Nanjing Medical University, Nanjing 210006, China

<sup>3</sup>Department of Anesthesiology, The Second Affiliated Hospital, Nanjing Medical University, Nanjing 210003, China

<sup>4</sup>Department of Anesthesiology, Jinling Hospital, Medical School of Nanjing University, Nanjing 210002, China

<sup>5</sup>Department of Anesthesiology, Pain and Perioperative Medicine, The First Affiliated Hospital of Zhengzhou University, Zhengzhou 450052, China

\*Equal contribution

**Correspondence to:** Jinchun Shen, Jianjun Yang; **email:** [yshen0203@163.com](mailto:yshen0203@163.com), <https://orcid.org/0000-0002-9529-7796>; [yjiangj@126.com](mailto:yjiangj@126.com), <https://orcid.org/0000-0001-6785-9627>

**Keywords:** elderly, frailty, orthopedic surgery, mortality

**Received:** October 10, 2020

**Accepted:** January 4, 2021

**Published:** February 26, 2021

**Copyright:** © 2021 Sun et al. This is an open access article distributed under the terms of the [Creative Commons Attribution License](https://creativecommons.org/licenses/by/3.0/) (CC BY 3.0), which permits unrestricted use, distribution, and reproduction in any medium, provided the original author and source are credited.

### ABSTRACT

Frailty is associated with perioperative adverse outcomes, especially for the elderly. This study aimed to assess whether frailty was an independent risk factor of one-year mortality in frail patients after elective orthopedic surgery. In this prospective study, three hundred and thirteen patients aged  $\geq 65$  years, undergoing elective orthopedic surgery were finally included. Frailty assessed by the Clinical Frailty Score (CFS) before the surgery was present in 29.7% (93/313). Among them, 7.7% of patients (24/313) died at one year after surgery. In multivariate logistic analysis, higher CFS (OR = 2.271, 95% CI = 1.472–3.504) was found to be an independent risk factor of one-year mortality after surgery in elderly orthopedic patients. The area under the receiver operating characteristic curve of the model was 0.897 (95% CI 0.834–0.959). In addition, we found higher Charlson comorbidity index (OR= 1.498, 95% CI = 1.082–2.073) was also a significant risk factor. In conclusion, frailty is associated with increased one-year mortality in elderly patients after elective orthopedic surgery, which should be considered as a routine assessment tool in preoperative practice.

### INTRODUCTION

It is predicted that by 2050, about 16% of the global population will be over 65, so the future demand for health care is expected to increase tremendously [1]. Elderly patients make up an ever-increasing proportion of the surgical population, which are associated with increased all-cause morbidity and mortality. However, there is no reliable tool to predict mortality of elderly patients undergoing elective orthopedic surgery.

Frailty is defined as an objective measurement of increased vulnerability and decreased physiological reserve, resulting from the age-associated accumulation of physiological deficits in multiple systems [2]. Frailty in the elderly is accompanied by sarcopenia, loss of function, and disability [3], which is associated with diminished resilience to stressors. Accumulating evidence has suggested that frailty is a risk factor for adverse outcomes, including prolonged hospitalization, increased morbidity and mortality [1, 2, 4, 5]. The Canadian Study of Health and Aging-Clinical Frailty

Scale (CSHA-CFS) is developed as a new tool to predict death or institutional care needs in 2005 [6, 7]. This scale is applied to elderly patients participating in the second stage of the CSHA, and has been recognized as a reliable tool to detect frailty in the medical setting [6]. The CFS is simple to perform and has a good correlation with the more thorough frailty index, which has been shown to predict morbidity and mortality in some surgical populations [7]. Meanwhile, the American College of Surgeons (ACS) and the American Geriatrics Society (AGS) jointly recommend frailty assessment as part of a preoperative assessment of the elderly patients. Although the CFS is a simple, less time-consuming and reliable tool, few studies have focused on its application in surgical patients. In addition, the results derived from the preoperative use of the CFS in a population consisting only of elderly patients undergoing elective orthopedic surgery remain to be elucidated.

Therefore, the aim of the present study was to assess whether frailty as assessed by the CFS can predict one-year mortality in elderly patients after elective orthopedic surgery.

## RESULTS

### Baseline characteristics

Three hundred and thirteen patients were finally included in our study (Figure 1). Baseline characteristics were presented in Table 1. Patients who died had advanced age ( $80.7 \pm 7.0$  years) compared with patients who survived

( $73.3 \pm 6.9$  years) ( $P < 0.001$ ). During one-year follow-up, 24 patients (7.7%) died. There was no statistically significant difference between males and females in one-year mortality ( $P = 0.079$ ). Patients who died had a higher CFS points [6 (4, 7)] compared with patients who survived [3 (2, 5)] ( $P < 0.001$ ). Moreover, patients who died had lower body mass index (BMI) and mini-mental state examination (MMSE) compared with patients who survived (all  $P < 0.05$ ). There were significantly higher American Society of Anesthesiologists (ASA) Grade, Charlson comorbidity index, basic activities of daily living (BADL) and instrumental activities of daily living (IADL) in patients who died than patients alive (all  $P < 0.05$ ). Patients who died used more prescription drugs compared with patients who survived ( $P = 0.029$ ).

Albumin (Alb), hemoglobin (Hb), and platelet (PLT) were lower in patients who died than patients alive (all  $P < 0.05$ ). However, C-reactive protein (CRP) and interleukin-6 (IL-6) in patients who died were higher compared with patients alive (all  $P < 0.05$ ). Blood loss was significantly higher in patients who died compared with patients alive ( $P = 0.007$ ). In addition, 58.3% of patients who died had post-operative delirium compared with 14.2% patients alive ( $P < 0.001$ ). Median length of stay for patients who died was longer compared with patients alive ( $P = 0.001$ ). Moreover, the rate of 30 d-readmission in patients who died was significantly higher than patients alive ( $P = 0.015$ ). There was a statistically significant association between increased one-year mortality and higher 30 d-comprehensive complication index (30 d-CCI) ( $P < 0.001$ ).

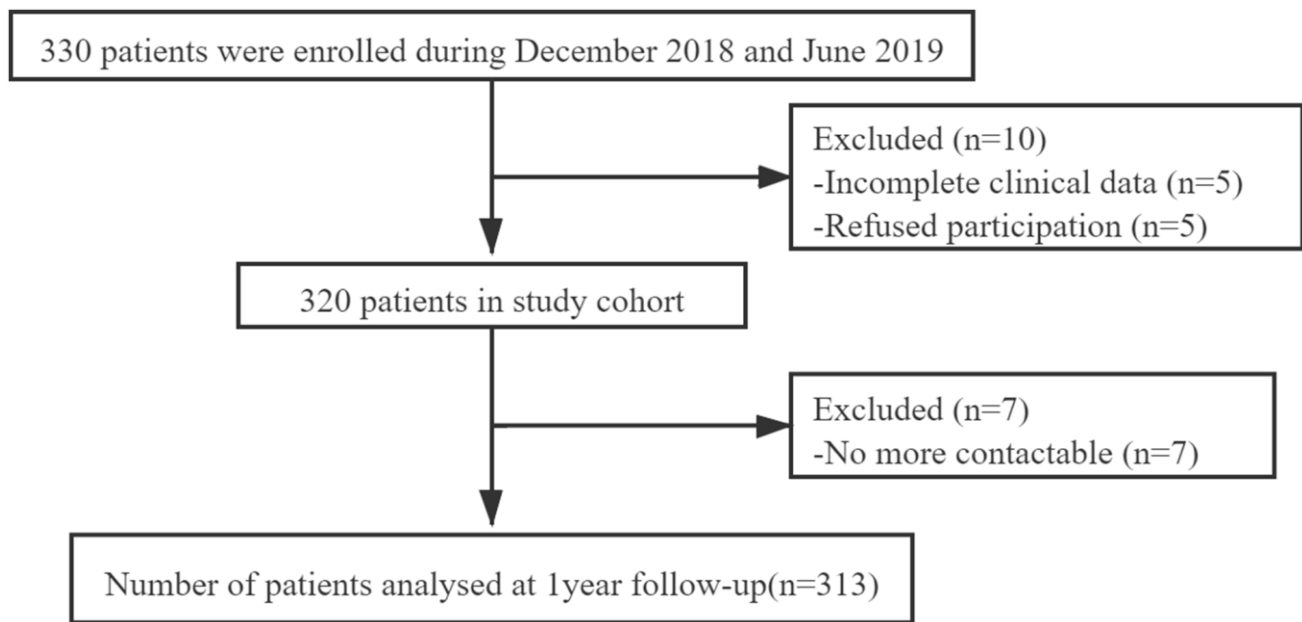

Figure 1. Patient enrollment flow chart.

**Table 1. Characteristics of elderly patients undergoing elective orthopedic surgery according to survival status within one-year.**

| Variables                                        | Patients alive<br>N=289 | Patients died<br>N=24 | All patients<br>N=313 | P       |
|--------------------------------------------------|-------------------------|-----------------------|-----------------------|---------|
| <b>Preoperative variables</b>                    |                         |                       |                       |         |
| Age, years, mean $\pm$ SD                        | 73.3 $\pm$ 6.9          | 80.7 $\pm$ 7.0        | 73.9 $\pm$ 7.2        | < 0.001 |
| Sex (female)                                     | 206 (71.3%)             | 13 (54.2%)            | 219 (70.0%)           | 0.079   |
| BMI (kg/m <sup>2</sup> ), median (IQR)           | 24.5 (22.0, 26.7)       | 22.5 (20.2, 24.5)     | 24.3 (21.9, 26.5)     | 0.009   |
| Education, years, median (IQR)                   | 6.0 (0.0, 9.0)          | 5.0 (0.0, 12.0)       | 6.0 (0.0, 9.5)        | 0.966   |
| Prescription drugs, n                            | 2 (1, 3)                | 3 (1, 5)              | 2 (1, 3)              | 0.029   |
| ASA Grade                                        |                         |                       |                       | < 0.001 |
| ASA I                                            | 7 (2.4 %)               | 0 (0.0 %)             | 7 (2.2%)              |         |
| ASA II                                           | 174 (60.2 %)            | 1 (4.2 %)             | 175 (55.9%)           |         |
| ASA III                                          | 105 (36.3 %)            | 19 (79.2 %)           | 124 (39.6%)           |         |
| ASA IV                                           | 3 (1.0 %)               | 4 (16.7 %)            | 7 (2.2%)              |         |
| MMSE, points, median (IQR)                       | 21 (17, 25)             | 15 (12, 18)           | 21 (17, 25)           | < 0.001 |
| Charlson comorbidity index, points, median (IQR) | 1 (0, 2)                | 3 (2, 5)              | 1 (0, 2)              | < 0.001 |
| BADL, points, median (IQR)                       | 2 (0, 7)                | 11 (5, 12)            | 2 (0, 8)              | < 0.001 |
| IADL, points, median (IQR)                       | 8 (6, 12)               | 17 (12, 21)           | 8 (6, 13)             | < 0.001 |
| CFS, points, median (IQR)                        | 3 (2, 5)                | 6 (4, 7)              | 3 (2, 5)              | < 0.001 |
| Alb (g/L), mean $\pm$ SD                         | 38.1 $\pm$ 4.0          | 36.0 $\pm$ 3.5        | 37.9 $\pm$ 4.0        | 0.014   |
| Hb (g/L), mean $\pm$ SD                          | 126.1 $\pm$ 16.7        | 112.5 $\pm$ 20.7      | 125.0 $\pm$ 17.4      | < 0.001 |
| PLT ( $\times 10^9/L$ ), mean $\pm$ SD           | 212 $\pm$ 64            | 182 $\pm$ 63          | 210 $\pm$ 64          | 0.030   |
| CRP (g/L), median (IQR)                          | 2.2 (0.5, 15.7)         | 23.3 (1.2, 56.5)      | 2.3 (0.5, 18.9)       | 0.004   |
| IL-6 (ng/L), median (IQR)                        | 7.3 (2.8, 15.5)         | 20.5 (10.6, 33.5)     | 8.1 (2.9, 18.6)       | 0.001   |
| <b>Intraoperative variables</b>                  |                         |                       |                       |         |
| Amount of blood loss (ml), median (IQR)          | 200 (120, 250)          | 265 (200, 350)        | 200 (120, 280)        | 0.007   |
| Duration of surgery (min), median (IQR)          | 75 (60, 95)             | 78 (60, 106)          | 75 (60, 95)           | 0.660   |
| Type of anesthesia (general anesthesia)          | 72 (24.9%)              | 5 (20.8%)             | 77 (24.6%)            | 0.656   |
| <b>Postoperative variables</b>                   |                         |                       |                       |         |
| Post-operative delirium                          | 41 (14.2%)              | 14 (58.3%)            | 55 (17.6%)            | < 0.001 |
| Length of stay, days, median (IQR)               | 7 (6, 9)                | 10 (7, 13)            | 7 (6, 9)              | 0.001   |
| 30-d Readmission                                 | 19 (6.6 %)              | 5 (23.8 %)            | 24 (7.7 %)            | 0.015   |
| 30-d CCI, points, mean $\pm$ SD                  | 0.0 (0.0, 25.7)         | 38.2 (23.0, 56.3)     | 0.0 (0.0, 29.6)       | < 0.001 |

Abbreviation: SD, Standard deviation; IQR, interquartile range; BMI, body mass index; ASA Grade, American Society of Anesthesiologists Grade; MMSE, mini-mental state examination; BADL, basic activities of daily living; IADL, instrumental activities of daily living; CFS, the Clinical Frailty Score; Alb, albumin; Hb, hemoglobin; PLT, platelet; CRP, C-reactive protein; IL-6, interleukin-6; 30-d Readmission, 30-day readmission; 30-d CCI, 30-day comprehensive complication index.

### Predictive factors of one-year mortality

The mean CFS score of all participants was  $3 \pm 2$  points. Ninety-three patients were identified to be frail with a CFS score  $\geq 5$  (Figure 2). Univariate logistic analysis showed that twelve factors were significantly associated with one-year mortality. The multivariate logistic analysis identified higher baseline CFS (OR = 2.271, 95% CI = 1.472–3.504) and Charlson comorbidity index (OR = 1.498, 95% CI = 1.082–2.073) as significant risk factors of one-year mortality after elective orthopedic surgery (Table 2). The

receiver operating characteristic (ROC) curve derived from CFS had an area under the curve (AUC) of 0.897 (95% CI: 0.834–0.959) (Figure 3).

### DISCUSSION

With the development of surgical, anesthetic and intensive care technologies, more and more elderly patients require surgery. It was estimated that approximately 53% of operations were performed on patients older than 65 years [8]. Of the surgical patients

selected in the National Surgical Quality Improvement Program database, 7% of patients underwent orthopedic surgery [9]. In addition, the incidence of frailty is substantially higher in high-risk populations, especially for elderly patients having major orthopedic surgery (41%) [10, 11]. In the present study, we showed that frailty identified by the CFS is significantly associated with increased one-year mortality in elderly patients undergoing elective orthopedic surgery.

Preoperative assessment is vital for hospitalized elderly patients at risk of adverse outcomes. However, there are currently limited screening tools to predict adverse postoperative complications in vulnerable individuals. Evaluation of preoperative risk is usually performed by assessing the ASA Grade. These tools are limited because they cannot cover the complexity of the elderly [12]. Therefore, the existence of frailty has become a method for clinicians to describe the physiological reserve of the elderly.

In recent years, frailty as a screening tool to predict the outcome after major surgery has attracted more and more attention. It can measure the physiological reserve and the ability of the patient to manage surgical stress accurately and easily. Although the ACS recommends a preoperative assessment of frailty, one gold standard to measure the degree of frailty has not yet existed. Frailty

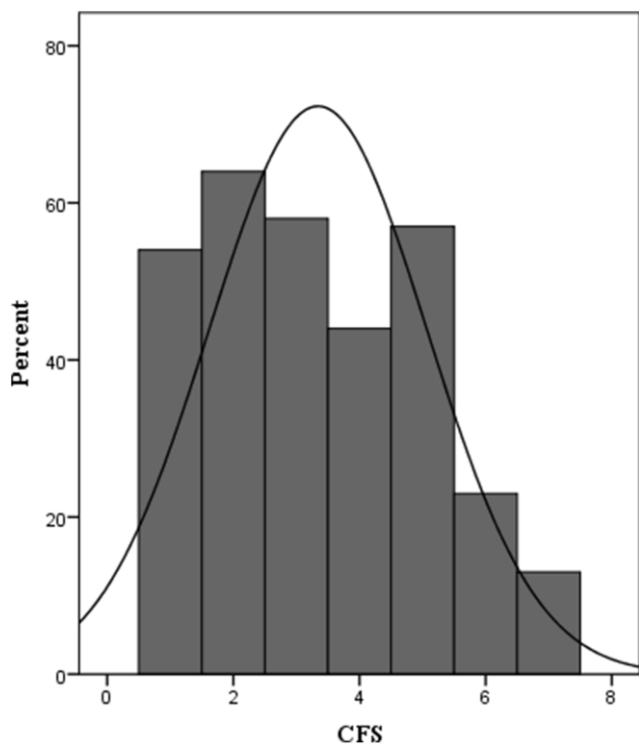

**Figure 2. Distribution of CFS at admission.** CFS, the Clinical Frailty Score, CFS  $\geq$  5 (frail).

is a complex state composed of multiple domains, with incremental increases in frailty scores predicting greater risk of one-year mortality. Although there are many tools for the assessment of frailty, the CFS is a useful tool that is widely used to predict the mortality across studies. For example, the presence of frailty calculated using the progressive CFS in older adults undergoing emergency laparotomy was associated with greater risks of postoperative mortality and was independent of age [13]. In addition, the CFS was a negative prognostic factor for cancer-specific survival in elderly patients with hepatocellular carcinoma who underwent hepatectomy [14]. A recent systematic review and meta-analysis indicated that the CFS was associated with increased mortality, with the largest effect size of any instrument [15]. Moreover, the CFS is reported to improve all measures of predictive performance across outcomes compared to the Fried Phenotype and Frailty Index. Thus, CFS should be recommended as a preferred tool for frailty assessment in preoperative practice [16].

Identifying frail patients, especially when undergoing an elective orthopedic surgery, may be a crucial step in coping with postoperative outcomes and reducing one-year mortality rate. In our previous study, we used Edmonton Frail Scale for frailty assessment, which suggested that frailty is an independent risk predictor of postoperative short-term complications after elective orthopedic surgery, even after adjusting for important confounding factors [17]. In the present study, we used another tool for frailty assessment by the CFS and found frailty is an independent risk factor for one-year mortality after elective orthopedic surgery. Our results are supported by other studies, which suggested that frailty is associated with adverse postoperative outcomes, including prolonged hospital stay, institution discharge, and increased mortality [11, 18–21]. However, the majority of these previous studies have focused on the association between frailty and mortality among community-dwelling older persons or residents in acute care settings [20–21], rather than on those undergoing orthopedic surgery. In addition, these studies also used other methods for frailty assessment, which is based on strength, gait, body composition, and fatigue [21] or a frailty index (FI) using 36 health-related deficits/variables [20]. Indeed, it has been suggested that a more targeted strategy to improve postoperative outcomes may be facilitated using the CFS, a simple, less time-consuming and reliable tool [22].

Some limitations have been noted in our study. Firstly, patients with severe comorbidities might introduce a selection bias and thereby overestimated the prevalence of frailty. Some studies have shown that current frailty assessments may be affected by bias and are less

**Table 2. Factors affecting one-year mortality: multivariate analysis.**

| Predictive factors         | OR    | 95% CI      | P      |
|----------------------------|-------|-------------|--------|
| CFS                        | 2.271 | 1.472–3.504 | <0.001 |
| Charlson comorbidity index | 1.498 | 1.082–2.073 | 0.015  |
| Age                        | 1.050 | 0.941–1.171 | 0.385  |
| BMI                        | 0.952 | 0.818–1.107 | 0.523  |
| Prescription drugs         | 1.056 | 0.829–1.346 | 0.659  |
| MMSE                       | 0.931 | 0.824–1.051 | 0.247  |
| IADL                       | 0.905 | 0.748–1.095 | 0.303  |
| Alb                        | 1.134 | 0.985–1.305 | 0.081  |
| Hb                         | 0.972 | 0.943–1.002 | 0.064  |
| PLT                        | 0.993 | 0.984–1.001 | 0.084  |
| IL-6                       | 1.011 | 0.989–1.033 | 0.336  |
| Amount of blood loss       | 1.002 | 0.998–1.006 | 0.332  |

OR = odds ratio.

Abbreviation: CFS, the Clinical Frailty Score; BMI, body mass index; MMSE, mini-mental state examination; IADL, instrumental activities of daily living; Alb, albumin; Hb, hemoglobin; PLT, platelet; IL-6, interleukin-6.

feasible in very frail or ill patients [23, 24]. Since these tools for frailty rely on physical assessment tests, some studies have proposed the measurement of sarcopenia as an objective, quantitative replacement for frailty in various surgical procedures [25, 26]. Nevertheless, we believed that measurement of sarcopenia is a time-consuming and not readily available process, requiring additional hospitalization costs. Another limitation of this study was related to its single-center nature. Therefore, the generalizability of our results is not

guaranteed, and the results may be affected by unmeasured confounding variables. Finally, given that one-year mortality was our primary endpoint, future studies should consider other patient-centered outcomes, including long-term postoperative complications and quality of life assessment.

In the present study, we have proved that frailty identified by the CFS is associated with increased one-year mortality after elective orthopedic surgery in elderly patients. Thus, frailty has additional value compared with traditional risk assessment tools and may be used to optimize the risk stratification of this elderly patient population.

## MATERIALS AND METHODS

### Study design and data collection

We finally evaluated 313 consecutive adult patients over 65 undergoing elective orthopedic surgery from December 2018 through July 2020 in Jinling Hospital. The flowchart of data collection was shown in Figure 1. The prospective cohort study was registered online at <https://www.clinicaltrials.gov/> (NCT03792373) and approved by the Ethics Committee of the Jinling Hospital. Informed consents of all patients were obtained. Data of frailty based on the CFS were collected using an interview and clinical examination. Clinical and demographic characteristics were collected by reviewing medical records. Follow-up data for 30 days and one year after surgery were obtained through telephone.

### Frailty assessment

Frailty of each patient at admission was evaluated by the CFS developed by the Canadian Study of Health

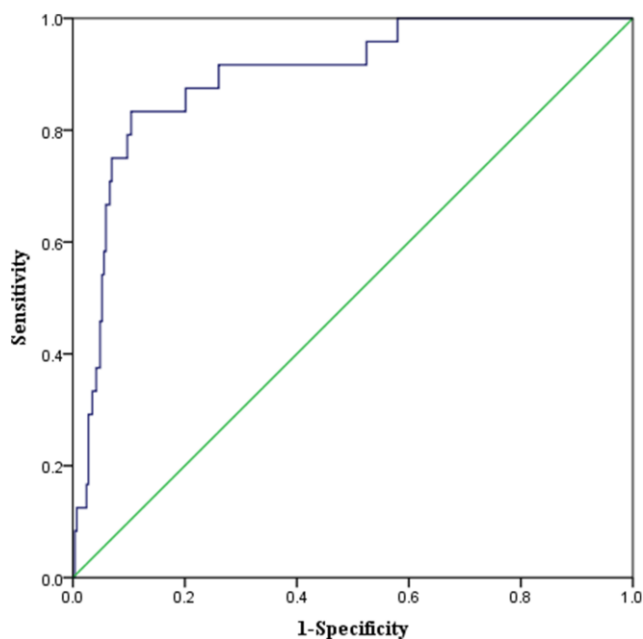

**Figure 3. ROC Curve of the predictive model of one-year mortality in elderly patients undergoing elective orthopedic surgery. AUC 0.897 ( $P < 0.001$ , 95% CI 0.834–0.959).**

**Table 3. The clinical frailty score (CFS) developed by the Canadian study of health and ageing (CSHA).**

|                                       |                                                                                                                                           |
|---------------------------------------|-------------------------------------------------------------------------------------------------------------------------------------------|
| 1—Very fit                            | Robust, active, energetic, well motivated, and fit; these people commonly exercise regularly and are in the most fit group for their age. |
| 2—Well                                | Without active disease, but less fit than people in category 1.                                                                           |
| 3—Well, with treated comorbid disease | Disease symptoms are well controlled compared with those in category 4.                                                                   |
| 4—Apparently vulnerable               | Although not frankly dependent, these people commonly complain of being “slowed up” or have disease symptoms.                             |
| 5—Mildly frail                        | With limited dependence on others for instrumental activities of daily living.                                                            |
| 6—Moderately frail                    | Help is needed with both instrumental and noninstrumental activities of daily living.                                                     |
| 7—Severely frail                      | Dependent on others for activities of daily living, or terminally ill.                                                                    |

and Ageing (Table 3) [13]. The CFS is a 7-point comprehensive frailty scale based on clinical assessment of physical activity, energy, mobility and function. This 7-point progressive score was developed within an older adult population and is based on the clinical judgment that patients were considered as non-frail (1 to 4 points), or frail (5 to 7 points). The CFS has been found to be a valid and reproducible score that is simple to understand and apply.

#### Clinical data selection

Besides the CFS and one-year mortality, routine clinical data were collected pre-, intra- and postoperatively, including preoperative parameters such as age, sex, BMI, educational years, prescription drugs, ASA Grade, MMSE [27], Charlson comorbidity index [28], BADL [29], IADL [30], Alb, Hb, PLT, CRP, IL-6; intraoperative parameters such as blood loss, duration of surgery, type of anesthesia; and postoperative parameters and outcomes including postoperative delirium [31], length of stay, 30 d-readmission and 30-d CCI [32].

#### Statistical analysis

Statistical analysis was performed using SPSS version 23.0 software. Continuous variables were presented as mean  $\pm$  standard deviation (SD) or median and interquartile range (IQR) when categorical variables were presented as number (percentage). Data with skewed distribution was evaluated using Mann-Whitney U test and the  $\chi^2$  test was used to compare categorical data between groups. We performed a logistic regression model referring to the other's previous cohort study [33], using the Wald Backward method to identify which factor was an independent risk factor of one-year mortality after elective orthopedic surgery. Variables with  $P < 0.10$  on the basis of the univariate logistic regression analysis were included in multiple logistic regression analyses, and the occurrence of one-year

mortality as dependent variable. In addition, a ROC curve analysis was performed to check the predictive value of the model.  $P < 0.05$  was considered statistically significant. In this study, the number of patients to be enrolled was determined on the basis of the number of predictive parameters inserted into the multivariate analysis. The general empiric rule suggested that the relationship between the total number of events and the number of groups of explicative variables had to be at least ten for each type of variable [33]. On the basis of these considerations, it was estimated to include at least 230 patients.

#### Abbreviations

BMI: body mass index; ASA Grade: American Society of Anesthesiologists Grade; ACS: the American College of Surgeons; AGS: the American Geriatrics Society; MMSE: mini-mental state examination; BADL: basic activities of daily living; IADL: instrumental activities of daily living; CSHA: the Canadian Study of Health and Aging; CFS: the Clinical Frailty Score; Alb: albumin; Hb: hemoglobin; PLT: platelet; CRP: C-reactive protein; IL-6: interleukin-6; CCI: comprehensive complication index.

#### AUTHOR CONTRIBUTIONS

Xiaoyun Sun designed the study, gathered the data, and wrote the manuscript; Yuying Shen gathered the data and gave many suggestions about this study; Muhuo Ji contributed to the final adjustments to the manuscript after critically revising it for intellectual content; Shanwu Feng prepared the manuscript; Yuzhu Gao gathered the data; Jianjun Yang conceived the study, and prepared the manuscript; Jinchun Shen conceived the study, and wrote the manuscript.

#### CONFLICTS OF INTEREST

The authors declare that they have no conflicts of interest.

## FUNDING

This work was supported by the grants from the National Natural Science Foundation of China (Nos. 81771156, 81772126).

## REFERENCES

1. Artiles-Armas M, Roque-Castellano C, Conde-Martel A, Marchena-Gómez J. The Comprehensive Complication Index is Related to Frailty in Elderly Surgical Patients. *J Surg Res*. 2019; 244:218–24. <https://doi.org/10.1016/j.jss.2019.06.011> PMID:[31301477](https://pubmed.ncbi.nlm.nih.gov/31301477/)
2. Schopmeyer L, El Moumni M, Nieuwenhuijs-Moeke GJ, Berger SP, Bakker SJ, Pol RA. Frailty has a significant influence on postoperative complications after kidney transplantation—a prospective study on short-term outcomes. *Transpl Int*. 2019; 32:66–74. <https://doi.org/10.1111/tri.13330> PMID:[30099780](https://pubmed.ncbi.nlm.nih.gov/30099780/)
3. Joo YS, Jhee JH, Kim HW, Han SH, Yoo TH, Kang SW, Park JT. Physical performance and chronic kidney disease development in elderly adults: results from a nationwide cohort study. *Aging (Albany NY)*. 2020; 12:17393–417. <https://doi.org/10.18632/aging.103741> PMID:[32915774](https://pubmed.ncbi.nlm.nih.gov/32915774/)
4. De Oliveira GS Jr. We need more studies to guide the perioperative management of high risk seniors undergoing surgery. *J Clin Anesth*. 2018; 48:89–90. <https://doi.org/10.1016/j.jclinane.2018.04.021> PMID:[29800923](https://pubmed.ncbi.nlm.nih.gov/29800923/)
5. Salminen M, Viljanen A, Eloranta S, Viikari P, Wuorela M, Vahlberg T, Isoaho R, Kivelä SL, Korhonen P, Irjala K, Löppönen M, Viikari L. Frailty and mortality: an 18-year follow-up study among Finnish community-dwelling older people. *Aging Clin Exp Res*. 2020; 32:2013–19. <https://doi.org/10.1007/s40520-019-01383-4> PMID:[31654244](https://pubmed.ncbi.nlm.nih.gov/31654244/)
6. Mclsaac DI, Taljaard M, Bryson GL, Beaulé PE, Gagné S, Hamilton G, Hladkovicz E, Huang A, Joannis JA, Lavallée LT, MacDonald D, Moloo H, Thavorn K, et al. Frailty as a predictor of death or new disability after surgery: a prospective cohort study. *Ann Surg*. 2020; 271:283–89. <https://doi.org/10.1097/SLA.0000000000002967> PMID:[30048320](https://pubmed.ncbi.nlm.nih.gov/30048320/)
7. Eamer G, Al-Amoodi MJ, Holroyd-Leduc J, Rolfson DB, Warkentin LM, Khadaroo RG. Review of risk assessment tools to predict morbidity and mortality in elderly surgical patients. *Am J Surg*. 2018; 216:585–94. <https://doi.org/10.1016/j.amjsurg.2018.04.006> PMID:[29776643](https://pubmed.ncbi.nlm.nih.gov/29776643/)
8. Yang R, Wolfson M, Lewis MC. Unique aspects of the elderly surgical population: an anesthesiologist's perspective. *Geriatr Orthop Surg Rehabil*. 2011; 2:56–64. <https://doi.org/10.1177/2151458510394606> PMID:[23569671](https://pubmed.ncbi.nlm.nih.gov/23569671/)
9. Molina CS, Thakore RV, Blumer A, Obremsky WT, Sethi MK. Use of the national surgical quality improvement program in orthopaedic surgery. *Clin Orthop Relat Res*. 2015; 473:1574–81. <https://doi.org/10.1007/s11999-014-3597-7> PMID:[24706043](https://pubmed.ncbi.nlm.nih.gov/24706043/)
10. Sonny A, Kurz A, Skolaris LA, Boehm L, Reynolds A, Cummings KC 3rd, Makarova N, Yang D, Sessler DI. Deficit accumulation and phenotype assessments of frailty both poorly predict duration of hospitalization and serious complications after noncardiac surgery. *Anesthesiology*. 2020; 132:82–94. <https://doi.org/10.1097/ALN.0000000000002959> PMID:[31834870](https://pubmed.ncbi.nlm.nih.gov/31834870/)
11. Mclsaac DI, Bryson GL, van Walraven C. Association of frailty and 1-year postoperative mortality following major elective noncardiac surgery: a population-based cohort study. *JAMA Surg*. 2016; 151:538–45. <https://doi.org/10.1001/jamasurg.2015.5085> PMID:[26791334](https://pubmed.ncbi.nlm.nih.gov/26791334/)
12. Gleason LJ, Benton EA, Alvarez-Nebreda ML, Weaver MJ, Harris MB, Javedan H. FRAIL questionnaire screening tool and short-term outcomes in geriatric fracture patients. *J Am Med Dir Assoc*. 2017; 18:1082–86. <https://doi.org/10.1016/j.jamda.2017.07.005> PMID:[28866353](https://pubmed.ncbi.nlm.nih.gov/28866353/)
13. Parmar KL, Law J, Carter B, Hewitt J, Boyle JM, Casey P, Maitra I, Farrell IS, Pearce L, Moug SJ, and ELF Study Group. Frailty in older patients undergoing emergency laparotomy: results from the UK observational emergency laparotomy and frailty (ELF) study. *Ann Surg*. 2019. [Epub ahead of print]. <https://doi.org/10.1097/SLA.0000000000003402> PMID:[31188201](https://pubmed.ncbi.nlm.nih.gov/31188201/)
14. Yamada S, Shimada M, Morine Y, Imura S, Ikemoto T, Arakawa Y, Saito Y, Yoshikawa M, Miyazaki K. Significance of frailty in prognosis after hepatectomy for elderly patients with hepatocellular carcinoma. *Ann Surg Oncol*. 2021; 28:439–46. <https://doi.org/10.1245/s10434-020-08742-w> PMID:[32562115](https://pubmed.ncbi.nlm.nih.gov/32562115/)
15. Aucoin SD, Hao M, Sohi R, Shaw J, Bentov I, Walker D, Mclsaac DI. Accuracy and feasibility of clinically applied frailty instruments before surgery: a systematic review and meta-analysis. *Anesthesiology*. 2020; 133:78–95. <https://doi.org/10.1097/ALN.0000000000003257> PMID:[32243326](https://pubmed.ncbi.nlm.nih.gov/32243326/)

16. McIsaac DI, Harris EP, Hladkovicz E, Moloo H, Lalu MM, Bryson GL, Huang A, Joannisse J, Hamilton GM, Forster AJ, van Walraven C. Prospective Comparison of Preoperative Predictive Performance Between 3 Leading Frailty Instruments. *Anesth Analg*. 2020; 131:263–72.  
<https://doi.org/10.1213/ANE.0000000000004475>  
PMID:[31569165](https://pubmed.ncbi.nlm.nih.gov/31569165/)
17. Sun X, Shen Y, Yang J, Qiu L, Ji M, Shen J. Frailty is an independent predictor of postoperative complications after elective orthopedic surgery: A prospective cohort study. *J Clin Anesth*. 2020; 63:109691.  
<https://doi.org/10.1016/j.jclinane.2019.109691>  
PMID:[32208348](https://pubmed.ncbi.nlm.nih.gov/32208348/)
18. Lin HS, Watts JN, Peel NM, Hubbard RE. Frailty and post-operative outcomes in older surgical patients: a systematic review. *BMC Geriatr*. 2016; 16:157.  
<https://doi.org/10.1186/s12877-016-0329-8>  
PMID:[27580947](https://pubmed.ncbi.nlm.nih.gov/27580947/)
19. Panayi AC, Orkaby AR, Sakthivel D, Endo Y, Varon D, Roh D, Orgill DP, Nepl RL, Javedan H, Bhasin S, Sinha I. Impact of frailty on outcomes in surgical patients: A systematic review and meta-analysis. *Am J Surg*. 2019; 218:393–400.  
<https://doi.org/10.1016/j.amjsurg.2018.11.020>  
PMID:[30509455](https://pubmed.ncbi.nlm.nih.gov/30509455/)
20. Hao Q, Zhou L, Dong B, Yang M, Dong B, Weil Y. The role of frailty in predicting mortality and readmission in older adults in acute care wards: a prospective study. *Sci Rep*. 2019; 9:1207.  
<https://doi.org/10.1038/s41598-018-38072-7>  
PMID:[30718784](https://pubmed.ncbi.nlm.nih.gov/30718784/)
21. Buchman AS, Wilson RS, Bienias JL, Bennett DA. Change in frailty and risk of death in older persons. *Exp Aging Res*. 2009; 35:61–82.  
<https://doi.org/10.1080/03610730802545051>  
PMID:[19173102](https://pubmed.ncbi.nlm.nih.gov/19173102/)
22. Hewitt J, Carter B, McCarthy K, Pearce L, Law J, Wilson FV, Tay HS, McCormack C, Stechman MJ, Moug SJ, Myint PK. Frailty predicts mortality in all emergency surgical admissions regardless of age. An observational study. *Age Ageing*. 2019; 48:388–94.  
<https://doi.org/10.1093/ageing/afy217>  
PMID:[30778528](https://pubmed.ncbi.nlm.nih.gov/30778528/)
23. Mok M, Allende R, Leipsic J, Altisent OA, Del Trigo M, Campelo-Parada F, DeLarochelière R, Dumont E, Doyle D, Côté M, Freeman M, Webb J, Rodés-Cabau J. Prognostic value of fat mass and skeletal muscle mass determined by computed tomography in patients who underwent transcatheter aortic valve implantation. *Am J Cardiol*. 2016; 117:828–33.  
<https://doi.org/10.1016/j.amjcard.2015.12.015>  
PMID:[26754122](https://pubmed.ncbi.nlm.nih.gov/26754122/)
24. Mamane S, Mullie L, Piazza N, Martucci G, Morais J, Vigano A, Levental M, Nelson K, Lange R, Afilalo J. Psoas muscle area and all-cause mortality after transcatheter aortic valve replacement: the montreal-munich study. *Can J Cardiol*. 2016; 32:177–82.  
<https://doi.org/10.1016/j.cjca.2015.12.002>  
PMID:[26821840](https://pubmed.ncbi.nlm.nih.gov/26821840/)
25. Heberton GA, Nassif M, Bierhals A, Novak E, LaRue SJ, Lima B, Hall S, Silvestry S, Joseph SM. Usefulness of psoas muscle area determined by computed tomography to predict mortality or prolonged length of hospital stay in patients undergoing left ventricular assist device implantation. *Am J Cardiol*. 2016; 118:1363–67.  
<https://doi.org/10.1016/j.amjcard.2016.07.061>  
PMID:[27622708](https://pubmed.ncbi.nlm.nih.gov/27622708/)
26. Hebel KR, Baumgarten H, Squiers JJ, Wooley J, Pollock BD, Mahoney C, Filardo G, Lima B, DiMaio JM. Albumin is predictive of 1-year mortality after transcatheter aortic valve replacement. *Ann Thorac Surg*. 2018; 106:1302–07.  
<https://doi.org/10.1016/j.athoracsur.2018.06.024>  
PMID:[30048632](https://pubmed.ncbi.nlm.nih.gov/30048632/)
27. Brigola AG, Alexandre TD, Inouye K, Yassuda MS, Pavarini SC, Mioshi E. Limited formal education is strongly associated with lower cognitive status, functional disability and frailty status in older adults. *Dement Neuropsychol*. 2019; 13:216–24.  
<https://doi.org/10.1590/1980-57642018dn13-020011>  
PMID:[31285797](https://pubmed.ncbi.nlm.nih.gov/31285797/)
28. Charlson ME, Pompei P, Ales KL, MacKenzie CR. A new method of classifying prognostic comorbidity in longitudinal studies: development and validation. *J Chronic Dis*. 1987; 40:373–83.  
[https://doi.org/10.1016/0021-9681\(87\)90171-8](https://doi.org/10.1016/0021-9681(87)90171-8)  
PMID:[3558716](https://pubmed.ncbi.nlm.nih.gov/3558716/)
29. Katz S, Ford AB, Moskowitz RW, Jackson BA, Jaffe MW. Studies of illness in the aged. The index of ADL: a standardized measure of biological and psychosocial function. *JAMA*. 1963; 185:914–19.  
<https://doi.org/10.1001/jama.1963.03060120024016>  
PMID:[14044222](https://pubmed.ncbi.nlm.nih.gov/14044222/)
30. Pfeffer RI, Kurosaki TT, Harrah CH Jr, Chance JM, Filos S. Measurement of functional activities in older adults in the community. *J Gerontol*. 1982; 37:323–29.  
<https://doi.org/10.1093/geronj/37.3.323>  
PMID:[7069156](https://pubmed.ncbi.nlm.nih.gov/7069156/)
31. Goudzwaard JA, de Ronde-Tillmans MJ, El Faquir N, Acar F, Van Mieghem NM, Lenzen MJ, de Jaegere PP, Mattace-Raso FU. The erasmus frailty score is associated with delirium and 1-year mortality after transcatheter aortic valve implantation in older patients. The TAVI care and cure program. *Int J Cardiol*. 2019; 276:48–52.



<https://doi.org/10.1016/j.ijcard.2018.10.093>

PMID:[30409734](https://pubmed.ncbi.nlm.nih.gov/30409734/)

32. Clavien PA, Vetter D, Staiger RD, Slankamenac K, Mehra T, Graf R, Puhan MA. The comprehensive complication index (CCI®): added value and clinical perspectives 3 years "down the line". *Ann Surg.* 2017; 265:1045–50.

<https://doi.org/10.1097/SLA.0000000000002132>

PMID:[28486288](https://pubmed.ncbi.nlm.nih.gov/28486288/)

33. Morri M, Ambrosi E, Chiari P, Orlandi Magli A, Gazineo D, D' Alessandro F, Forni C. One-year mortality after hip fracture surgery and prognostic factors: a prospective cohort study. *Sci Rep.* 2019; 9:18718.

<https://doi.org/10.1038/s41598-019-55196-6>

PMID:[31822743](https://pubmed.ncbi.nlm.nih.gov/31822743/)
